# Supplementary material for: Refinement of Magnetite Nanoparticles by Coating with Organic Stabilizers
Source: PubMed Central journal article supplement (PMC5302720; doi:10.3390/nano6120228), 2016-11-29
Supplement: nanomaterials-06-00228-s001.pdf [file nanomaterials-06-00228-s001.pdf]

# Supplementary Materials: Refinement of Magnetite Nanoparticles by Coating with Organic Stabilizers

Monica Cîrcu, Alexandrina Nan, Gheorghe Borodi, Jürgen Liebscher and Rodica Turcu

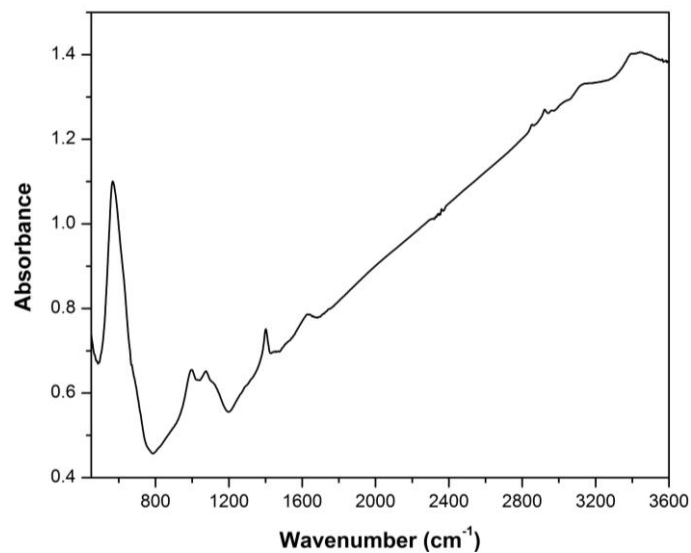

Figure S1. FTIR spectrum of 3a ( $\text{Fe}_3\text{O}_4$  covered with *O*-phosphoryl ethanolamine).

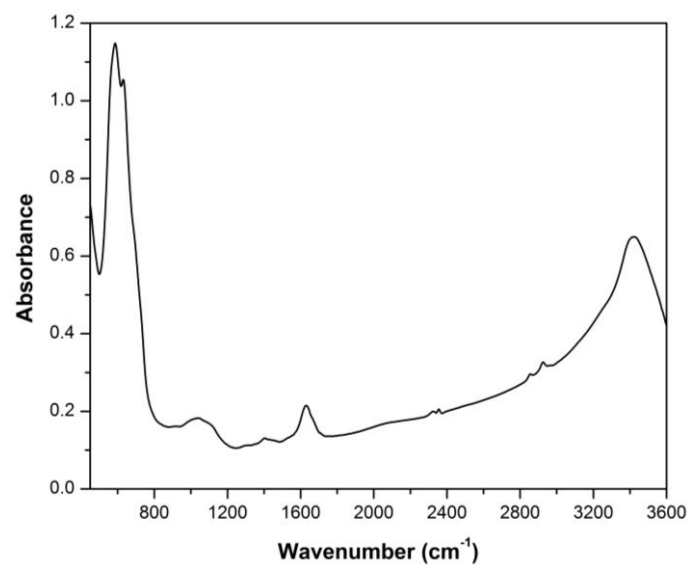

Figure S2. FTIR spectrum of 3c ( $\text{Fe}_3\text{O}_4$  covered with phospho-L-ascorbic acid).

**Table S1.** Average crystallite sizes and saturation magnetization of MNP 1 and 3 including crystallite sizes and strains obtained by applying Williamson-Hall method (right column).

| Entry | MNP     | Description                                                                 | XRPD (Average Crystallite Size-Scherrer) | VSM (Magnetization)/em u/g | Crystallite Size and Strain                                           |                  |
|-------|---------|-----------------------------------------------------------------------------|------------------------------------------|----------------------------|-----------------------------------------------------------------------|------------------|
|       |         |                                                                             |                                          |                            | $\beta_{\text{tot}} \cos \theta = C\epsilon \sin \theta + K\lambda/L$ | Crystallite Size |
| 1     | 1       | Naked Fe <sub>3</sub> O <sub>4</sub> , 3 h                                  | 11.5 nm                                  | 68.5                       | 11.0 nm                                                               | 30               |
| 2     | 1       | Naked Fe <sub>3</sub> O <sub>4</sub> , 24 h                                 | 14.1 nm                                  | 65.7                       | 14.2 nm                                                               | 9.5              |
| 3     | 3a-3 h  | Fe <sub>3</sub> O <sub>4</sub> covered with O-phosphoryl ethanolamine, 3 h  | 25.7 nm <sup>a</sup>                     | 69.6 <sup>a</sup>          | 20.1 nm                                                               | 15               |
| 4     | 3a-24 h | Fe <sub>3</sub> O <sub>4</sub> covered with O-phosphoryl ethanolamine, 24 h | 13.6 nm <sup>a</sup>                     | 67.8 <sup>a</sup>          | 13.4 nm                                                               | 20               |
| 5     | 3b-3 h  | Fe <sub>3</sub> O <sub>4</sub> covered with glycerol phosphate, 3 h         | 25 nm                                    | 68.8                       | 20.1 nm                                                               | 14               |
| 6     | 3b-24 h | Fe <sub>3</sub> O <sub>4</sub> covered with glycerol phosphate, 24 h        | 27.9 nm                                  | 70.8                       | 22.6 nm                                                               | 16               |
| 7     | 3c-3 h  | Fe <sub>3</sub> O <sub>4</sub> covered with phospho-L-ascorbic acid, 3 h    | 17.1 nm                                  | 68.2                       | 16.5 nm                                                               | 10               |
| 8     | 3c-24 h | Fe <sub>3</sub> O <sub>4</sub> covered with phospho-L-ascorbic acid, 24 h   | 13.3 nm                                  | 59.8                       | 13.0 nm                                                               | 3                |
| 9     | 3d-3 h  | Fe <sub>3</sub> O <sub>4</sub> covered with phospho-D,L-serine, 3 h         | 24.6 nm <sup>a</sup>                     | 64.6                       | 20.6 nm                                                               | 12               |
| 10    | 3d-24 h | Fe <sub>3</sub> O <sub>4</sub> covered with phospho-D,L-serine, 24 h        | 27.2 nm                                  | 65.4                       | 27.0 nm                                                               | 8                |
| 11    | 3e-3 h  | Fe <sub>3</sub> O <sub>4</sub> covered with glycolic acid, 3 h              | 32.0 nm                                  | 74.0                       | 27.0 nm                                                               | 15               |
| 112   | 3e-24 h | Fe <sub>3</sub> O <sub>4</sub> covered with glycolic acid, 24 h             | 39.0 nm <sup>a</sup>                     | 80                         | 34.7 nm                                                               | 10               |
| 13    | 3f-3 h  | Fe <sub>3</sub> O <sub>4</sub> covered with lactic acid, 3 h                | 25 nm                                    | 45.5 <sup>a</sup>          | 16.4 nm                                                               | 17               |
| 14    | 3f-24 h | Fe <sub>3</sub> O <sub>4</sub> covered with lactic acid, 24 h               | 20 nm                                    | 47.0 <sup>a</sup>          | 12.8 nm                                                               | 23               |
| 15    | 3g-3 h  | Fe <sub>3</sub> O <sub>4</sub> covered with malic acid, 3 h                 | 31.7 nm                                  | 71.9                       | 23.6 nm                                                               | 20               |
| 16    | 3g-24 h | Fe <sub>3</sub> O <sub>4</sub> covered with malic acid, 24 h                | 30.7 nm                                  | 68.1                       | 25.6 nm                                                               | 19               |
| 17    | 3h-3 h  | Fe <sub>3</sub> O <sub>4</sub> covered with mandelic acid, 3 h              | 15.2 nm                                  | 74.6                       | 14.6 nm                                                               | 3                |
| 18    | 3h-24 h | Fe <sub>3</sub> O <sub>4</sub> covered with mandelic acid, 24 h             | 15.3 nm                                  | 73                         | 14.4 nm                                                               | 15               |

<sup>a</sup> average value of two samples.

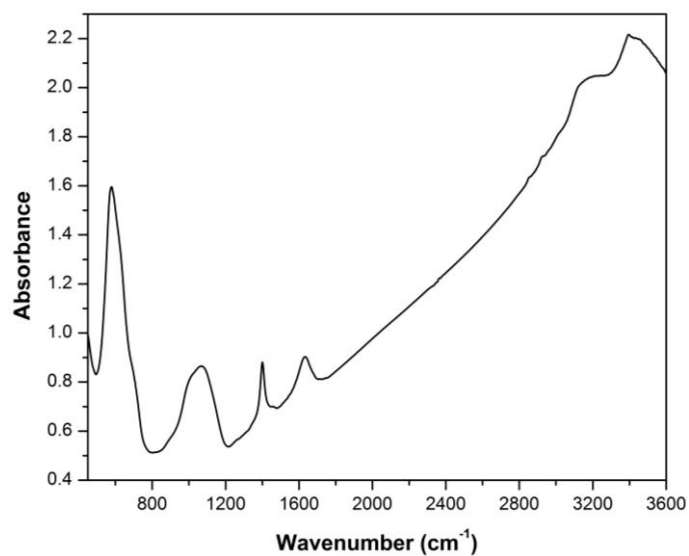

**Figure S3.** FTIR spectrum of **3d** ( $\text{Fe}_3\text{O}_4$  covered with phospho-D,L-serine).

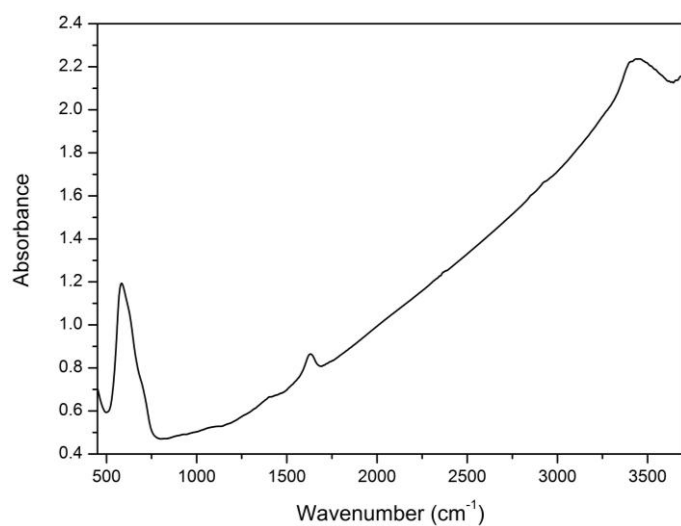

**Figure S4.** FTIR spectrum of **3e** ( $\text{Fe}_3\text{O}_4$  covered with glycolic acid).

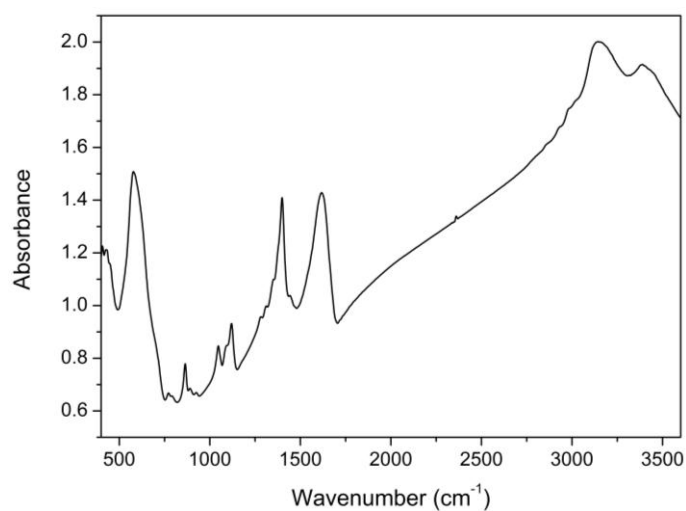

**Figure S5.** FTIR spectrum of **3f** ( $\text{Fe}_3\text{O}_4$  covered with lactic acid).

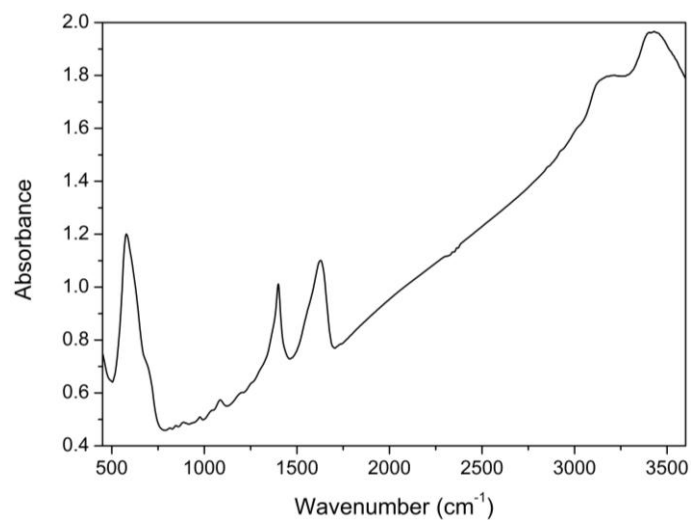

Figure S6. FTIR spectrum of **3g** ( $\text{Fe}_3\text{O}_4$  covered with malic acid).

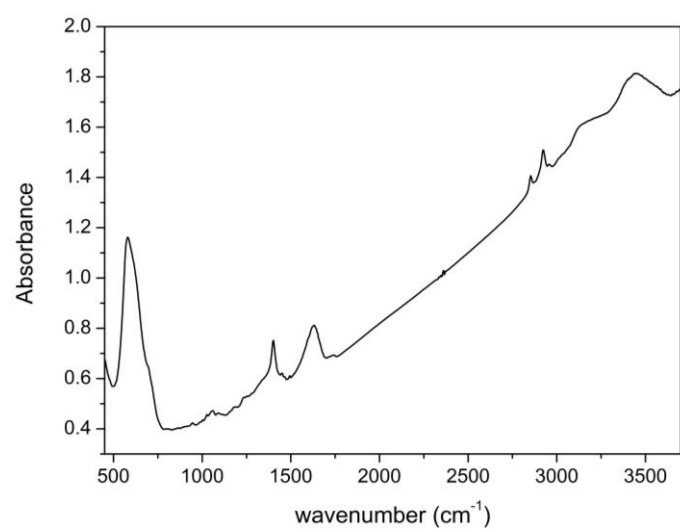

Figure S7. FTIR spectrum of **3h** ( $\text{Fe}_3\text{O}_4$  covered with mandelic acid).

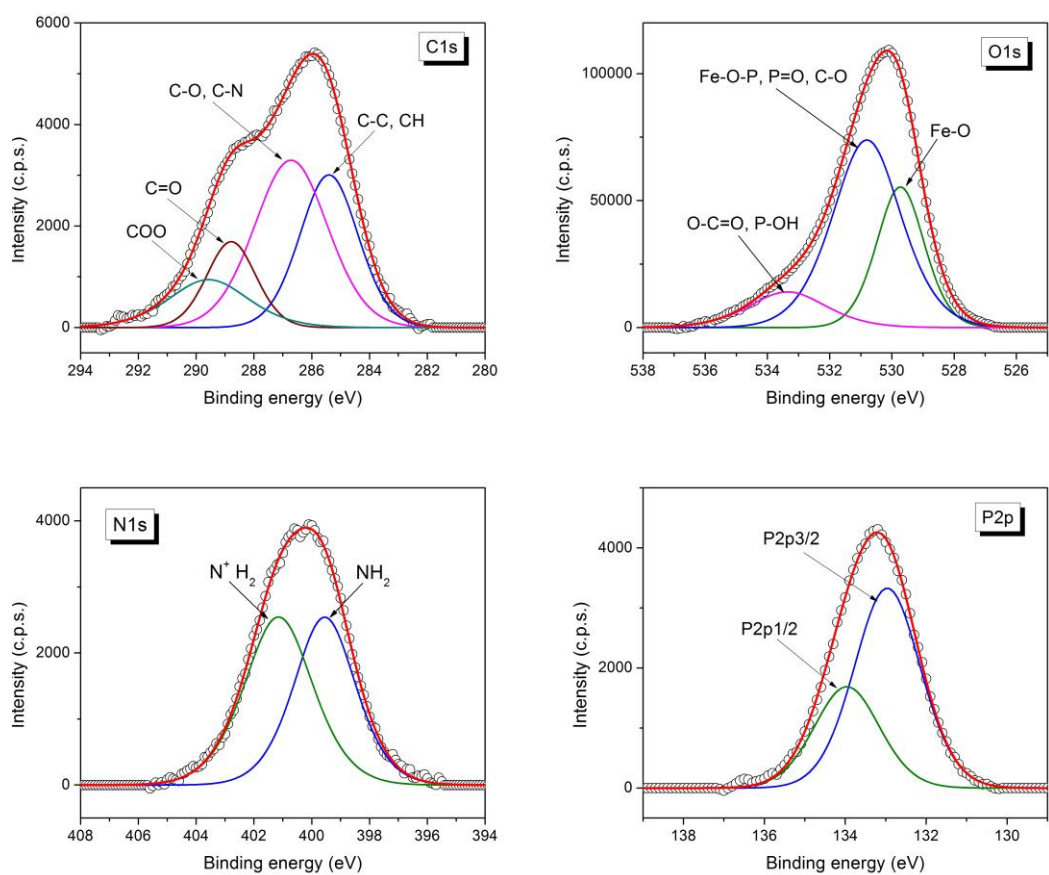

Figure S8. XPS spectra of 3d-3 h.

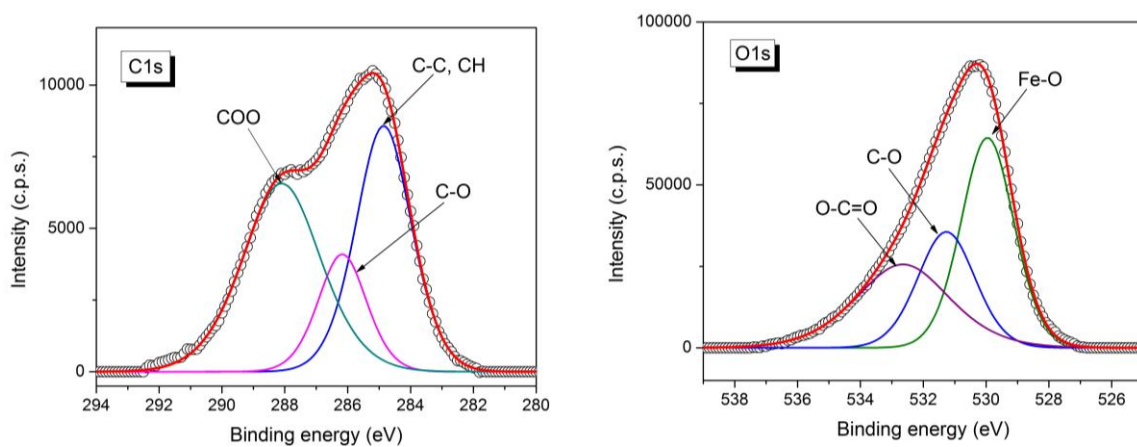

Figure S9. XPS spectra of 3f-3 h.

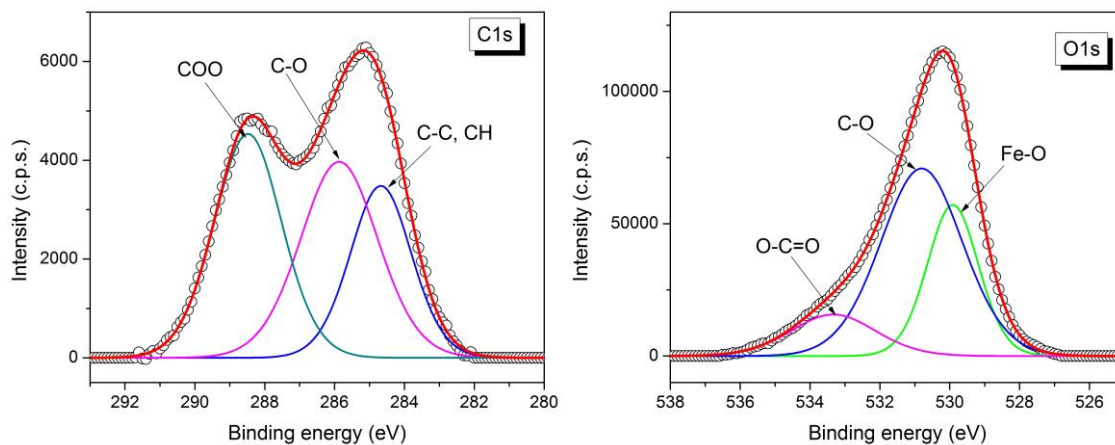

Figure S10. XPS spectra of 3g-3 h.

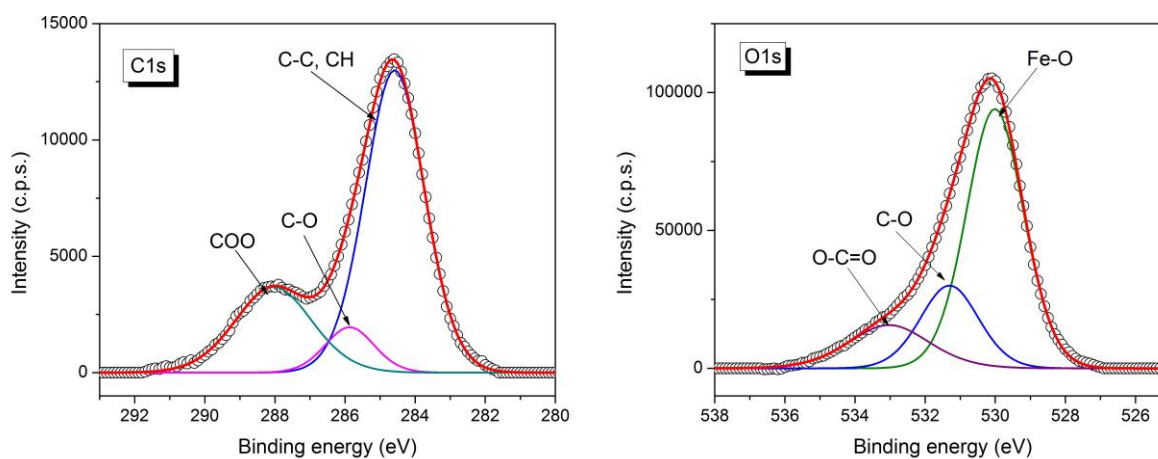

Figure S11. XPS spectra of 3h-3 h.

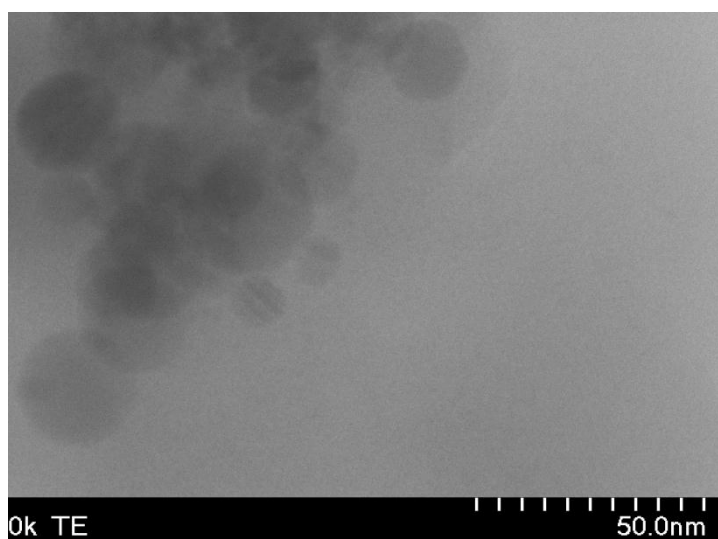

Figure S12. TEM image of 3c-3 h (Fe<sub>3</sub>O<sub>4</sub> covered with phospho-L-ascorbic acid).

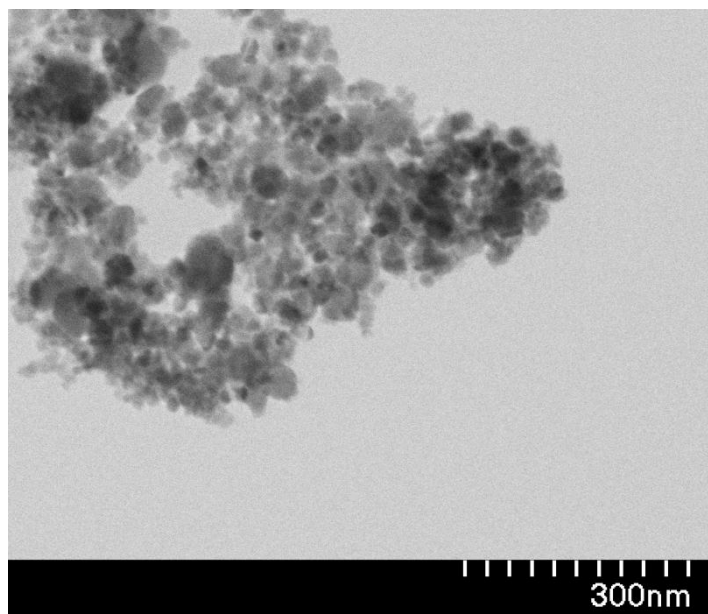

**Figure S13.** TEM image of 3e-24 h ( $\text{Fe}_3\text{O}_4$  covered with glycolic acid).

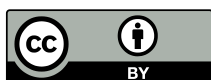

© 2016 by the authors. Submitted for possible open access publication under the terms and conditions of the Creative Commons Attribution (CC-BY) license (<http://creativecommons.org/licenses/by/4.0/>).
